# Supplementary material for: Planar copper and nickel triangles with a guanidine-derived ligand
Source: Royal Society of Chemistry journal article supplement (doi:10.1039/c5qi00085h), 2015-01-01
Supplement: c5qi00085h1.pdf [file c5qi00085h1.pdf]

## Supporting Information

### Planar Copper and Nickel Triangles with a Guanidine-derived Ligand

Takuto Matsumoto, Yamato Sato, Takuya Shiga\* and Hiroki Oshio\*

Prof. H. Oshio  
Graduate School of Pure and Applied Sciences,  
University of Tsukuba  
Tennodai 1-1-1, Tsukuba, Ibaraki 305-8571 (Japan)  
FAX: (+81)29-852-5923  
E-mail: oshio@chem.tsukuba.ac.jp

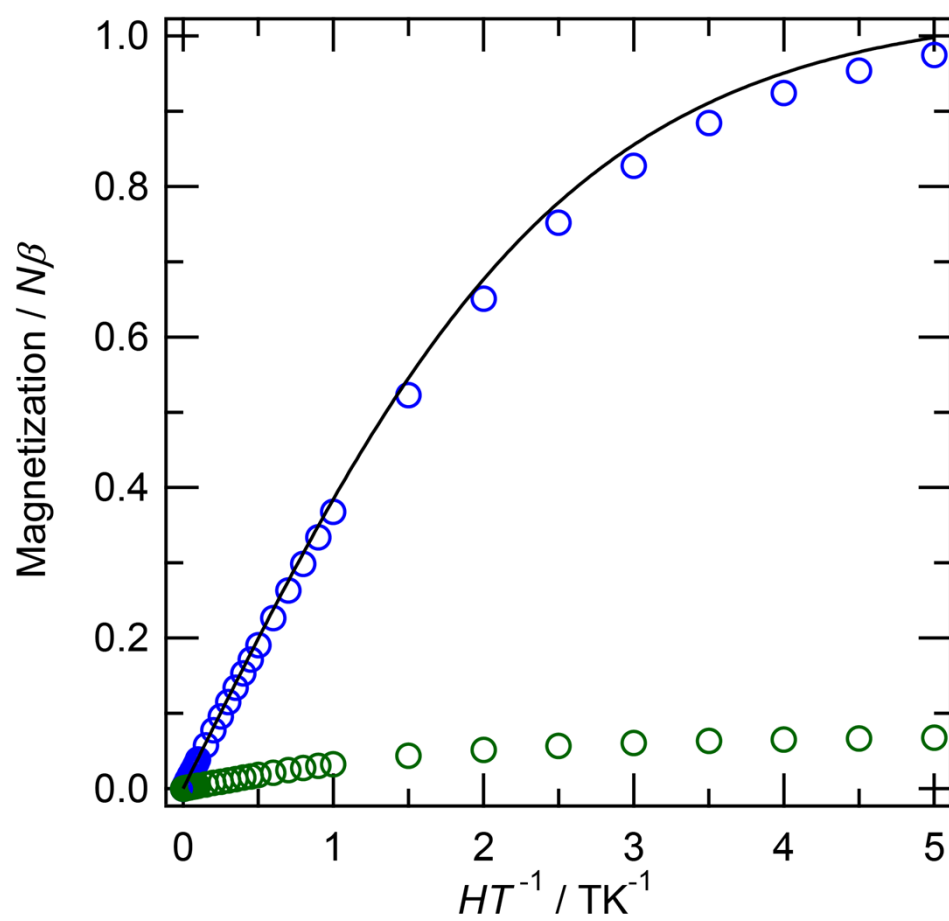

Figure S1 Magnetization curve of [Cu<sub>3</sub>] and [Ni<sub>3</sub>] with Brillouin function of  $S = 1/2$  ( $g = 2.08$ ).

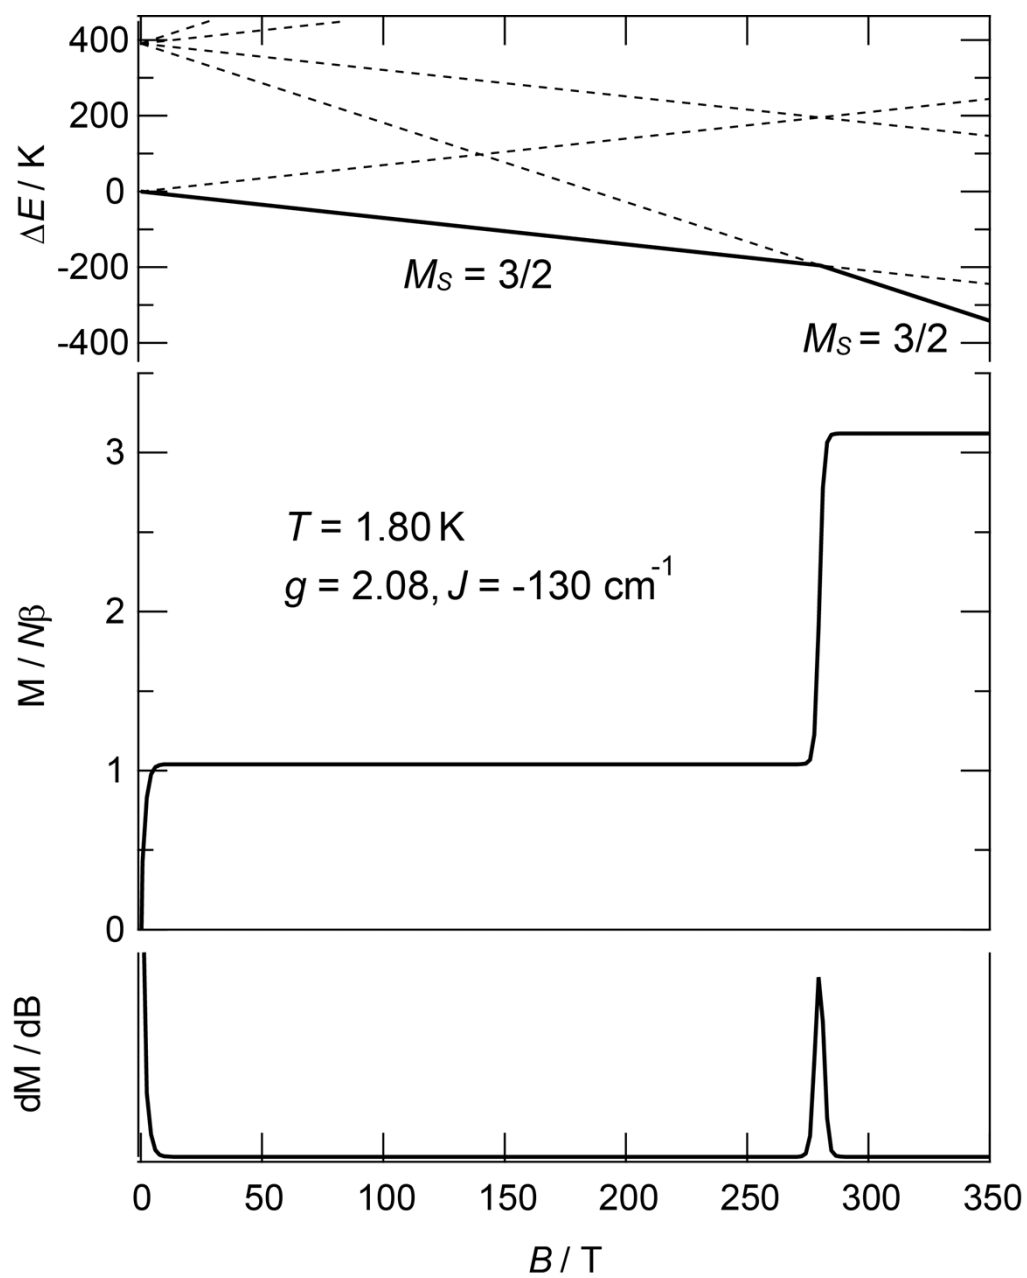

Figure S2 Zeeman diagram and estimated magnetization steps versus applied field.

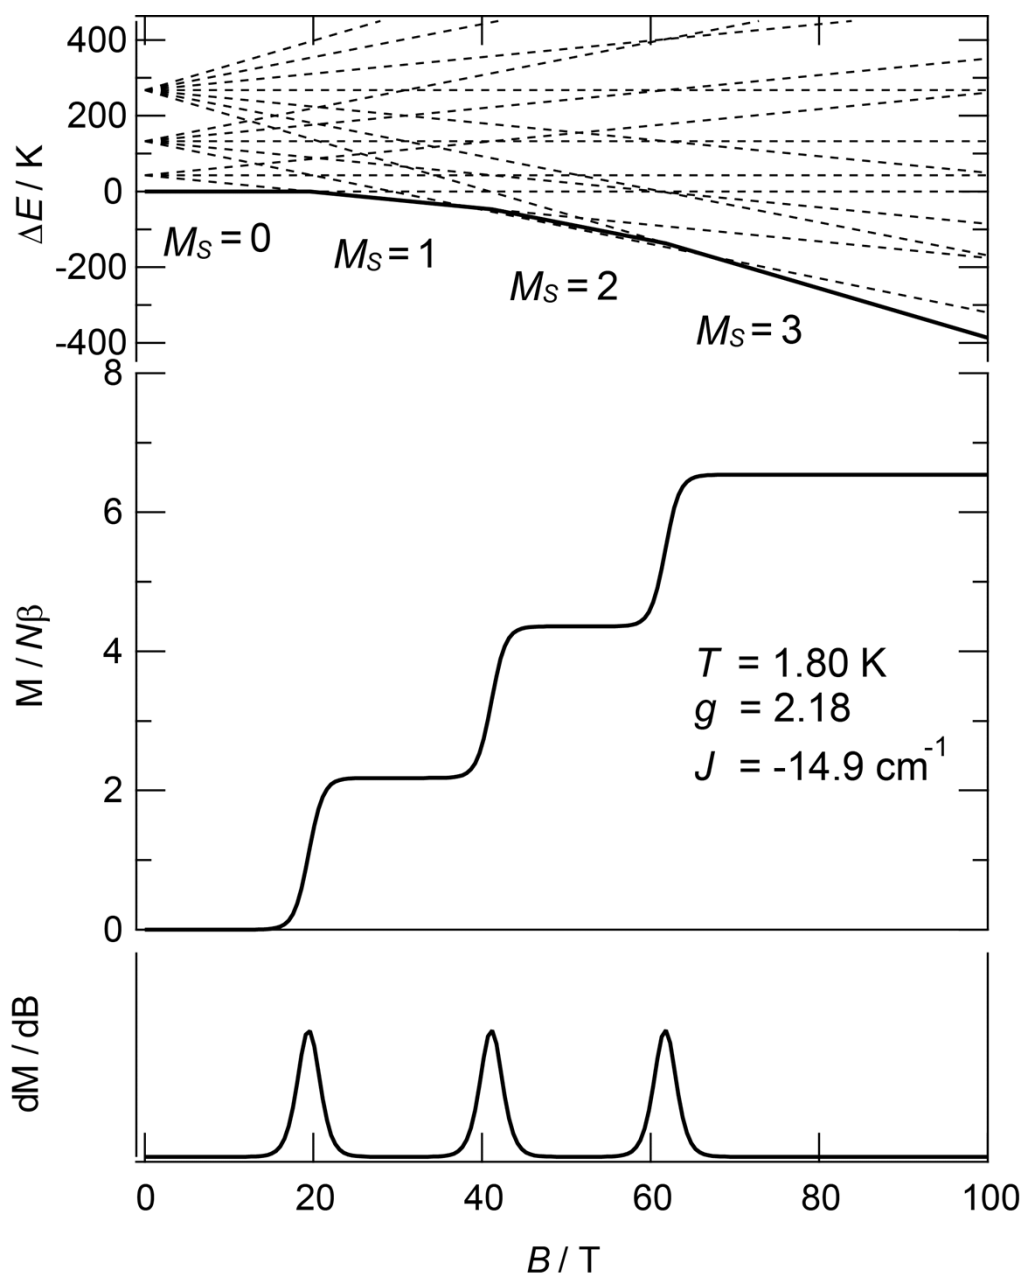

Figure S3 Zeeman diagram and estimated magnetization steps versus applied field.
